# Supplementary material for: Distinct immune stimulatory effects of anti-human VISTA antibodies are determined by Fc-receptor interaction
Source: PubMed Central journal article supplement (PMC9367637; doi:10.3389/fimmu.2022.862757), 2022-07-28
Supplement: DataSheet_1.pdf [file DataSheet_1.pdf]

Supplementary Material

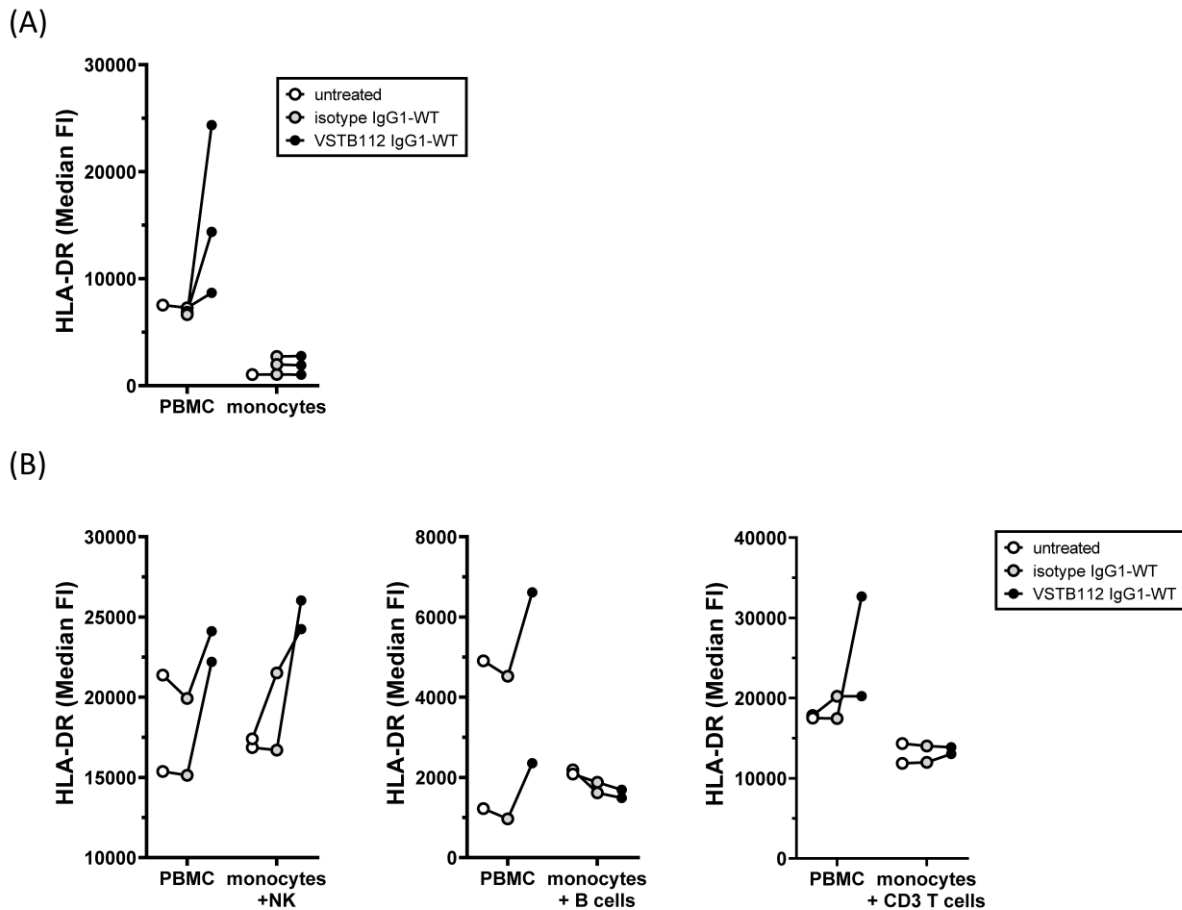

**Supplementary Figure 1. Cell populations relevant for in vitro functionality of VISTA antibodies**

**(A)** Total PBMC or enriched monocytes were treated with anti-VISTA-antibodies VSTB112 with IgG1-WT backbone. Data are from multiple experiments; each connected symbol indicates a separate donor.

**(B)** Indicated cell populations were separated from total PBMC, re-combined (within the same donor) and cultures treated with anti-VISTA-antibodies VSTB112 with IgG1-WT backbone. Data are from multiple experiments using the same two donors; each connected symbol indicates a separate donor.
